# Supplementary material
Source: publisher figshare collection journal article supplement (https://acs.figshare.com/ndownloader/files/3763303)
Supplement: Supplementary file 1 [file 3763303]

# Supporting Information : Selective and Regenerative Carbon Dioxide Capture by Highly Polarizing Porous Carbon Nitride

**Youngtak Oh,<sup>†,‡,#</sup> Viet-Duc Le,<sup>§,#</sup> Uday Narayan Maiti,<sup>‡</sup> Jin Ok Hwang,<sup>‡</sup> Woo Jin Park,<sup>⊥</sup> Joonwon Lim,<sup>†,‡</sup> Kyung Eun Lee,<sup>†,‡</sup> Youn-Sang Bae,<sup>||</sup> Yong-Hyun Kim,<sup>\*,§</sup> and Sang Ouk Kim,<sup>\*,†,‡</sup>**

<sup>†</sup>National Creative Research Initiative Center for Multi-Dimensional Directed Nanoscale Assembly, <sup>‡</sup>Department of Material Science and Engineering, <sup>§</sup>Graduate School of Nanoscience and Technology, <sup>⊥</sup>Department of Chemistry, KAIST, Daejeon 34141, Korea. <sup>||</sup>Department of Chemical and Biomolecular Engineering, Yonsei University, Seoul 120-749, Korea.

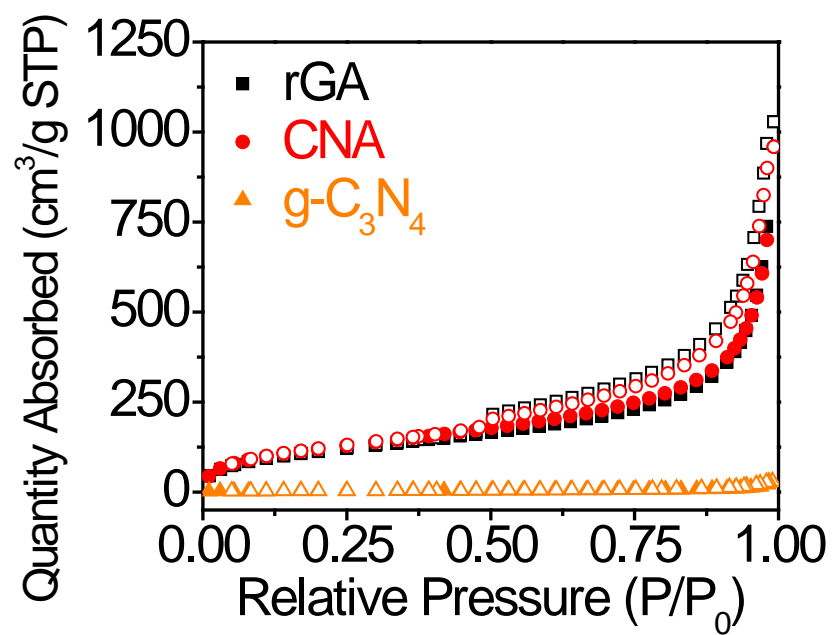

S Figure 1. Nitrogen Adsorption Isotherm of reduced graphene oxide aerogel (rGA), carbon nitride aerogel (CNA) and graphitic carbon nitride (g-C<sub>3</sub>N<sub>4</sub>).

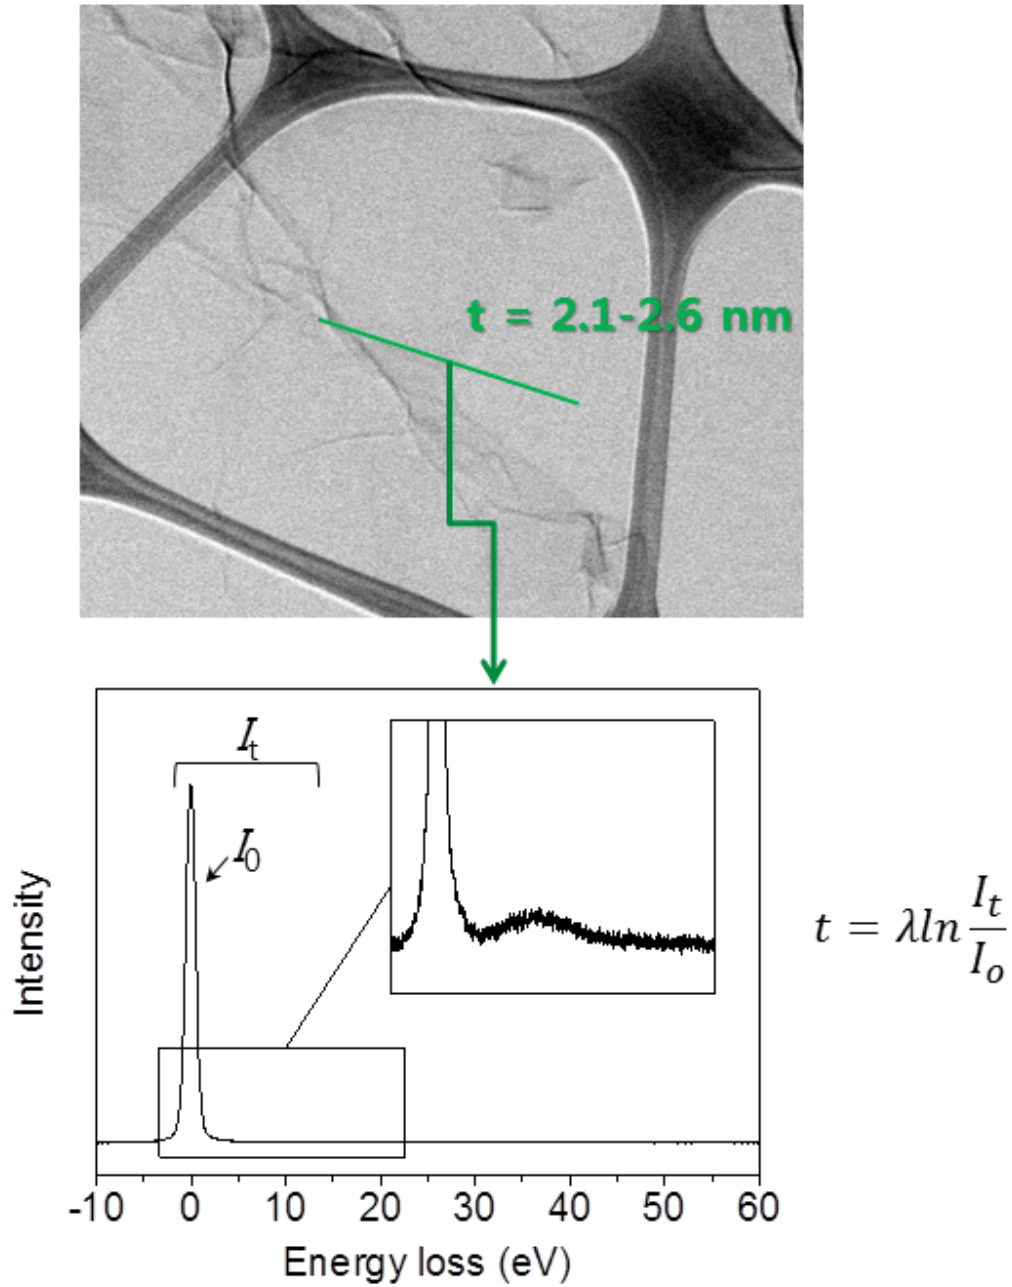

S Figure 2. TEM image with selected area of line scanning (green line) for core-loss spectrum from electron energy loss spectroscopy (EELS). Core-loss spectrum is used to measure thickness ( $t$ ) of CNA, where  $I_0$  and  $I_t$  corresponds to energy loss intensity at baseline and accumulated intensity sum in 0-20 eV range,  $\lambda$  as the mean path average.

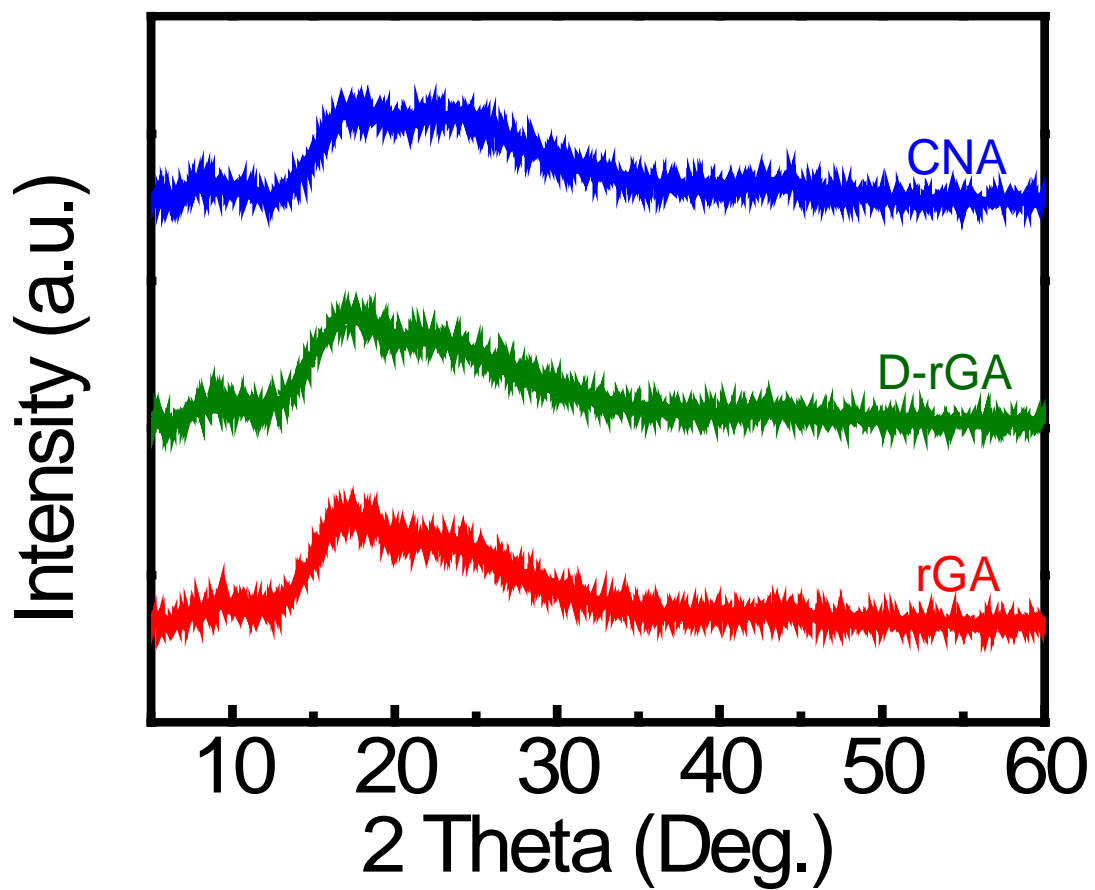

S Figure 3. PXRD pattern of CNA, D-rGA, and rGA sample showing amorphous surface of reduced graphene oxide aerogel .

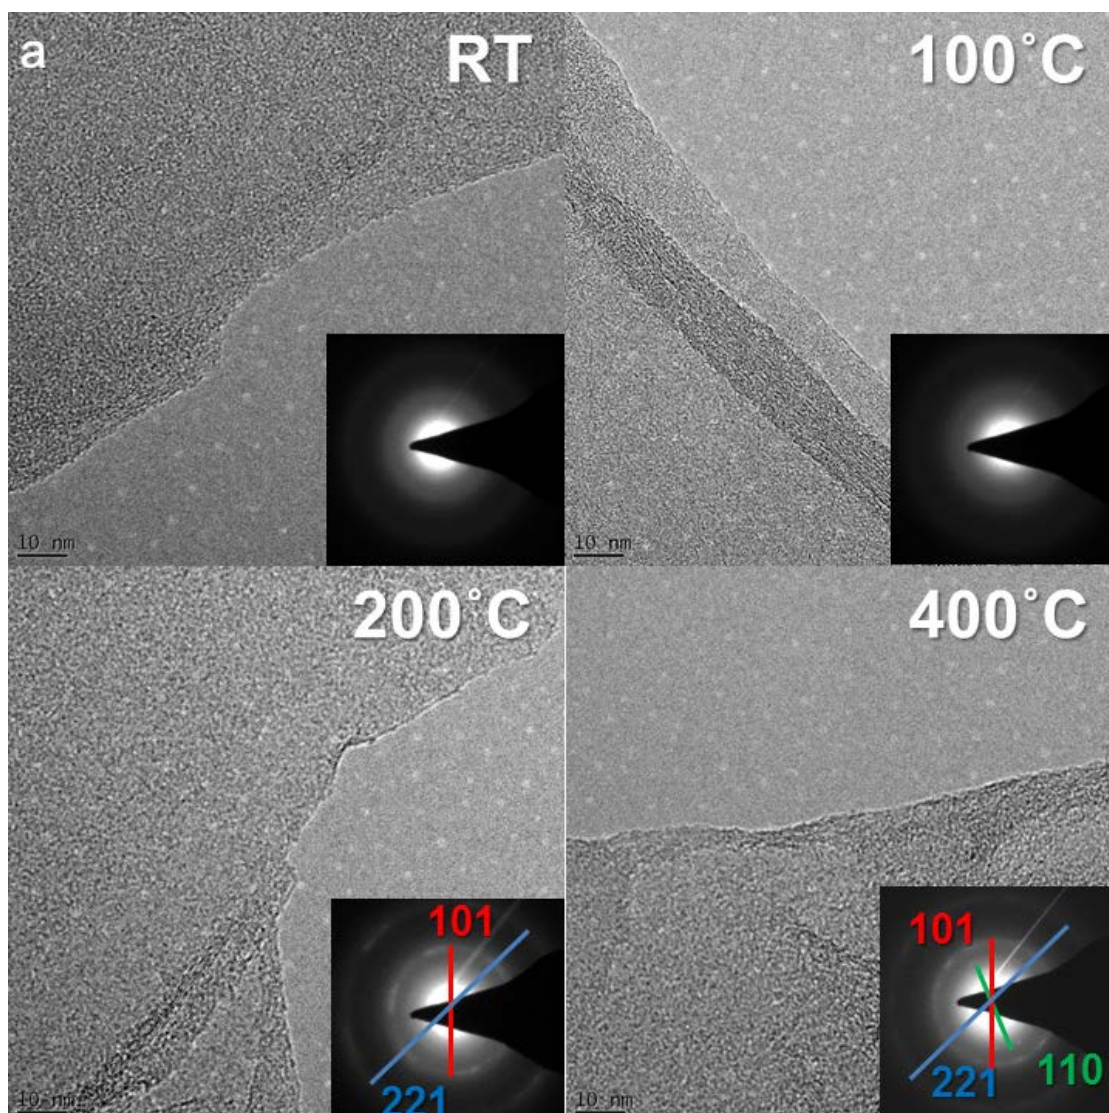

S Figure 4. TEM images and SAED (bottom right inset) of dicyandiamide functionalized reduced graphene oxide aerogel (D-rGA) transforming into carbon nitride aerogel (CNA) upon thermal treatment.

C=C | C-O/<sup>sp3</sup>C-N | C=O/O-C=O |

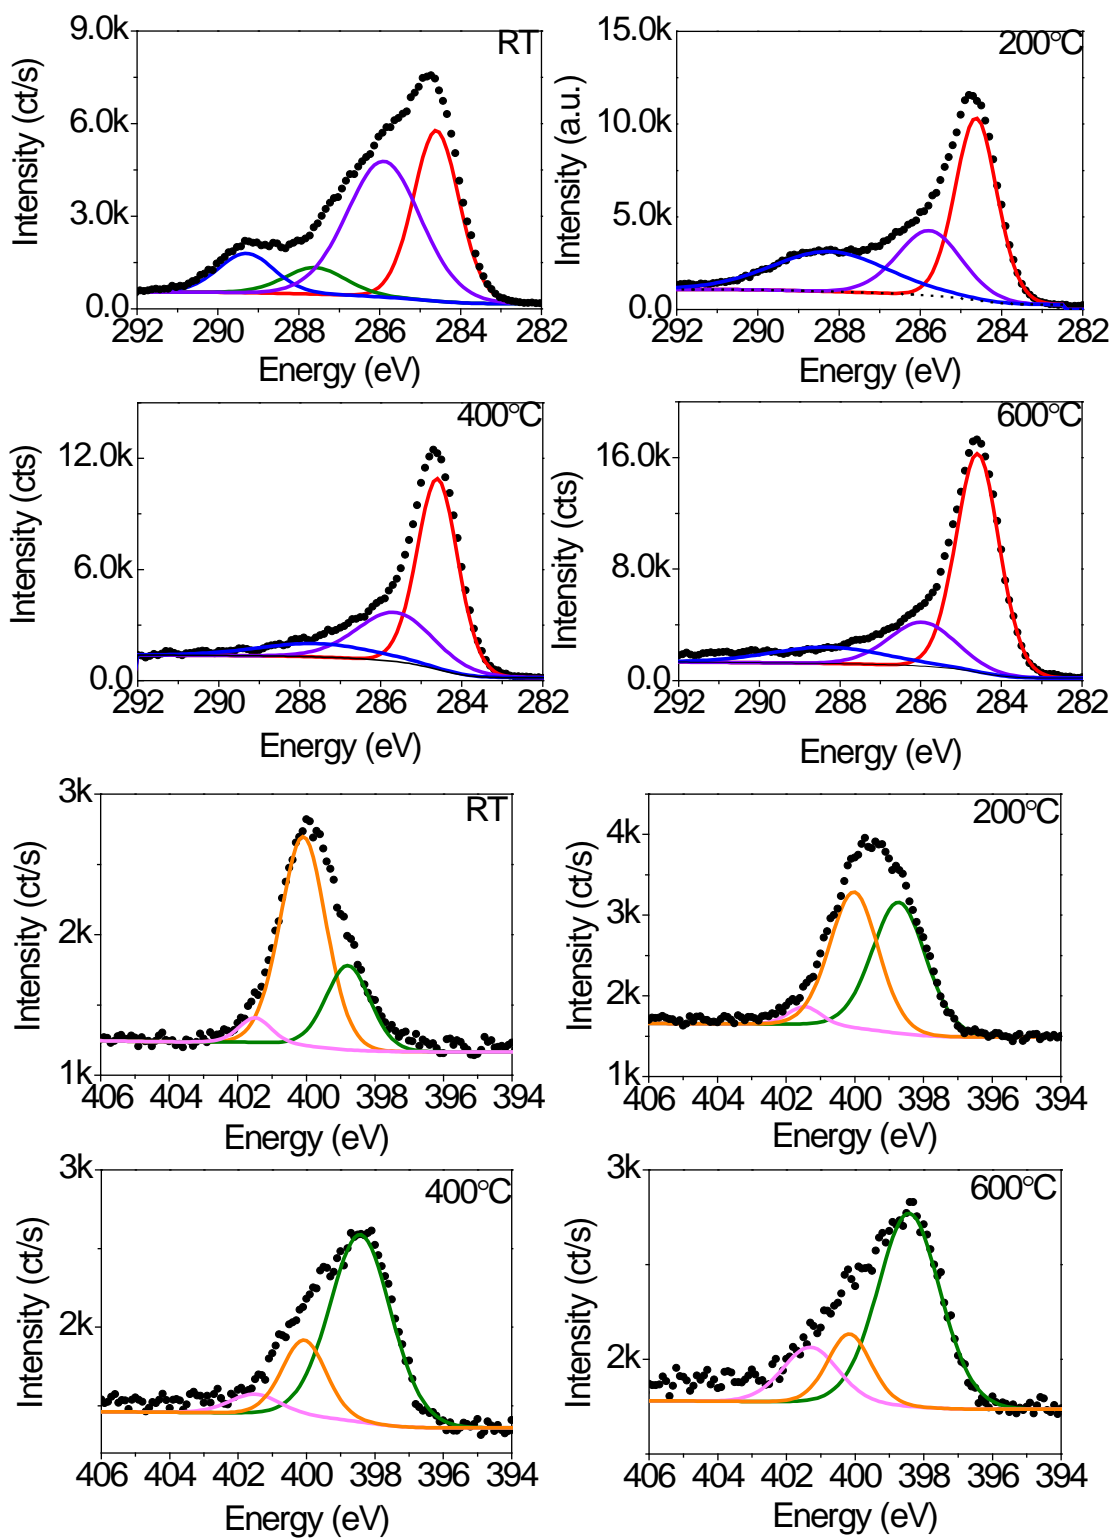



S Figure 5. XPS analysis of (top) C1s and (bottom) N1s scan showing how dicyandiamide on graphene surface transformed into condensed carbon nitride phase under temperature increase up to 600°C. Superscript 'AP' and 'AR' stands for aliphatic and aromatic state.

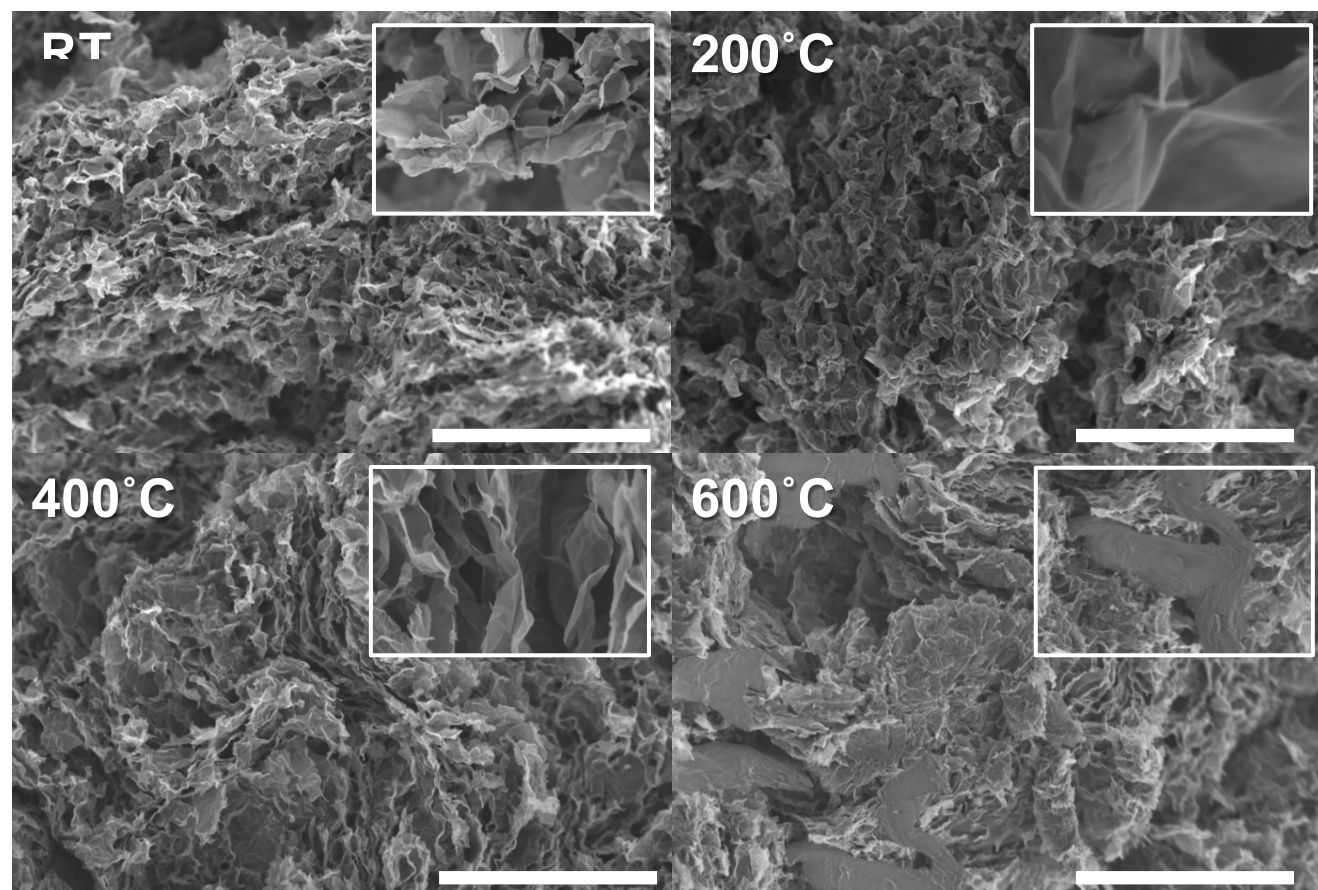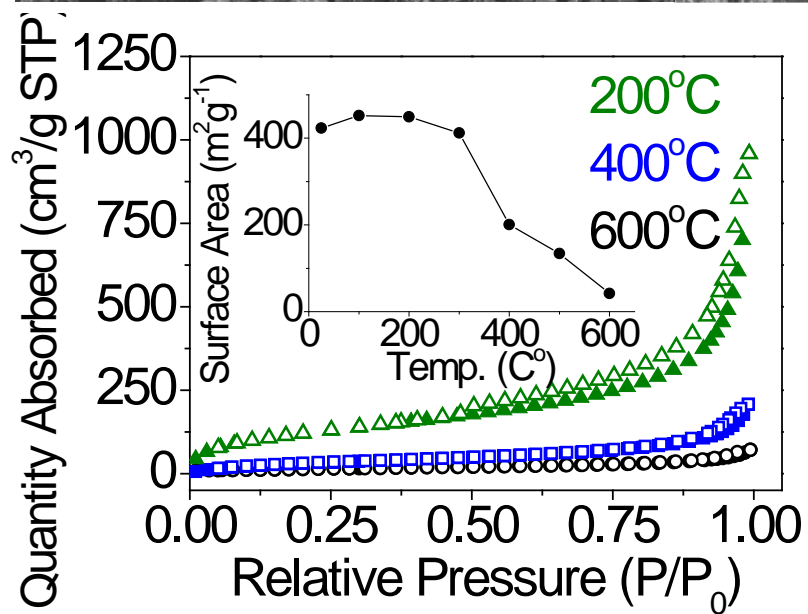

S Figure 6. (top) SEM analysis of CNA samples treated at various temperature conditions. Scale bar corresponds to 20  $\mu\text{m}$  length. (bottom) Thermal treatment effect on surface area of CNA.

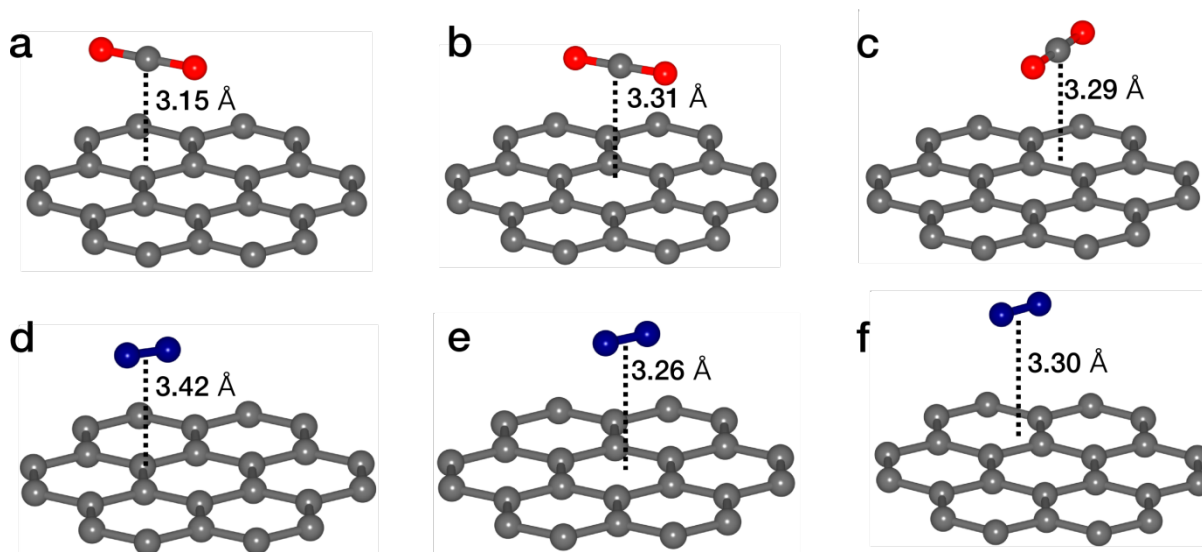

S Figure 7. Optimized geometry of  $\text{CO}_2$  adsorptions on (a) carbon top, (b) hexagonal ring and (c) bond center of a  $6 \times 6 \times 1$  supercell of pristine graphene. Here, only a portion of the graphene substrate is shown for the sake of clarity. The corresponding optimized geometries of  $\text{N}_2$  adsorptions are shown in (d), (e) and (f), respectively. The inset numbers represents the distance from center of gas molecule to graphene surface, in the unit of  $\text{\AA}$ .

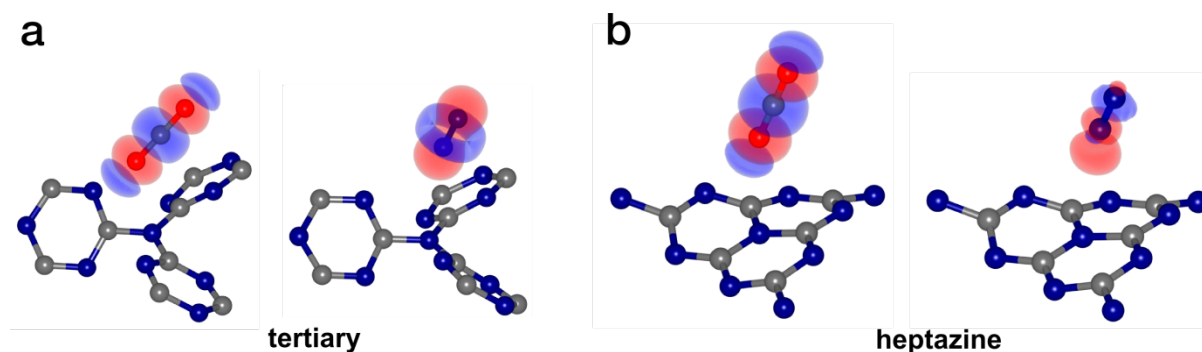

S Figure 8. (a) Iso-surface plot of the differential charge density for  $\text{CO}_2/\text{N}_2$  adsorption at the tertiary N site. b) Same as (a) for the heptazine site of  $g\text{-C}_3\text{N}_4$ . Blue and red colors represent electron depletion and accumulation, respectively.



S Table 1. Experimental ATR-IR vibrational frequencies of CNA and D-rGA

| Vibrational Frequency [ $\text{cm}^{-1}$ ]                                                                                                                |                 |                               |                              |                               |
|-----------------------------------------------------------------------------------------------------------------------------------------------------------|-----------------|-------------------------------|------------------------------|-------------------------------|
|                                                                                                                                                           | 2400-3600       | 1300-2400                     | 1000-1300                    | 600-1000                      |
| DCG                                                                                                                                                       | 3360 [m, br]    | 1700, 1730 [m]                | 1260 [w, sh]                 | 910 [s]                       |
|                                                                                                                                                           | $\nu\text{N-H}$ | $\nu\text{C=O}$ (carboxylic)  | $\nu\text{C-O}$ (carboxylic) | $\omega\text{C-H}$            |
|                                                                                                                                                           | 3180 [w, br]    | 1630 [vw]                     |                              | 730 [s]                       |
|                                                                                                                                                           | $\nu\text{O-H}$ | $\text{C=N}$ (aliphatic)      | 1200 [m, br]                 | $\omega\text{N-H}$ (amines)   |
|                                                                                                                                                           | 3020 [m, br]    | 1550 [m]                      | $\nu\text{C-O-C}$            | 620 [w]                       |
|                                                                                                                                                           | melamine        | $\nu\text{C=C}$ (aromatic)    | 1100 [m, sh]                 | $\delta\text{C-C}$ (aromatic) |
|                                                                                                                                                           | 2941 [m, vbr]   | 1357 [w]                      | $\nu\text{C-O}$              |                               |
|                                                                                                                                                           | $\nu\text{C-H}$ | $\delta\text{C-H}$ (aromatic) | 1060 [m, br]                 |                               |
| CNG                                                                                                                                                       |                 |                               | $\delta\text{C-C}$           |                               |
|                                                                                                                                                           | 3360 [m, br]    | 2350 [m]                      | 1270 [m]                     | 910 [s]                       |
|                                                                                                                                                           | $\nu\text{N-H}$ | $\nu\text{CO}_2$              | $\nu\text{C-O}$ (carboxylic) | $\omega\text{C-H}$            |
|                                                                                                                                                           | 3180 [w, br]    | 1750 [m, br]                  |                              | 812 [w, sh]                   |
|                                                                                                                                                           | $\nu\text{O-H}$ | $\nu\text{C=O}$ (carboxylic)  | 1350 [w, sh]                 | s-triazine                    |
|                                                                                                                                                           | 2990[s]         | 1570 [w]                      | $\nu\text{C-N}$ (aromatic)   | 736 [s]                       |
|                                                                                                                                                           | 2900 [m, sh]    | $\nu\text{C-N}$ (aromatic)    | 1073 [m]                     | $\omega\text{N-H}$ (amines)   |
|                                                                                                                                                           | $\nu\text{C-H}$ | 1530 [m, sh]                  | $\delta\text{C-C}$           | 620 [w]                       |
|                                                                                                                                                           |                 | $\nu\text{C=C}$ (aromatic)    |                              | $\delta\text{C-C}$ (aromatic) |
|                                                                                                                                                           |                 | 1480 [m]                      |                              |                               |
|                                                                                                                                                           |                 | $\nu\text{C-N}$ (aromatic)    |                              |                               |
| s : strong / m : medium / w : weak / br : broad / sh : shoulder / vw : very weak / v: vibration /<br>$\delta$ : in-plane deformation / $\omega$ : bending |                 |                               |                              |                               |
